# Supplementary material
Source: Springer Nature journal article supplement (https://www.springermedizin.de/resource/supplementary/12885_2010_2778_MOESM5_ESM.pdf/9461800)

A

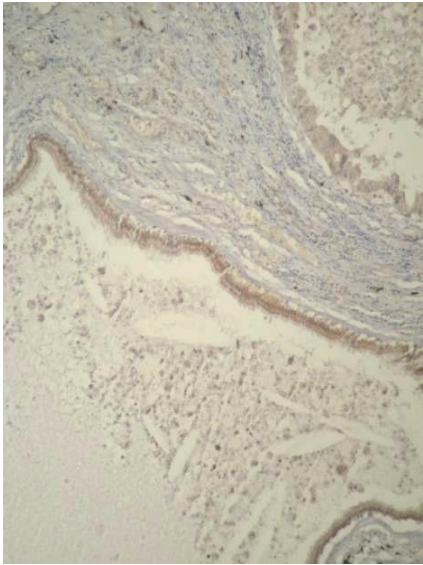

B

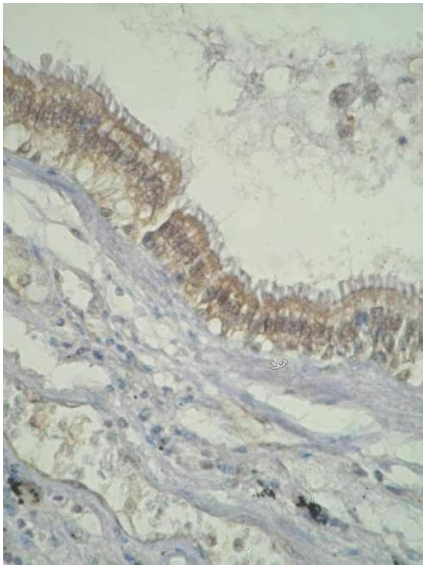

C

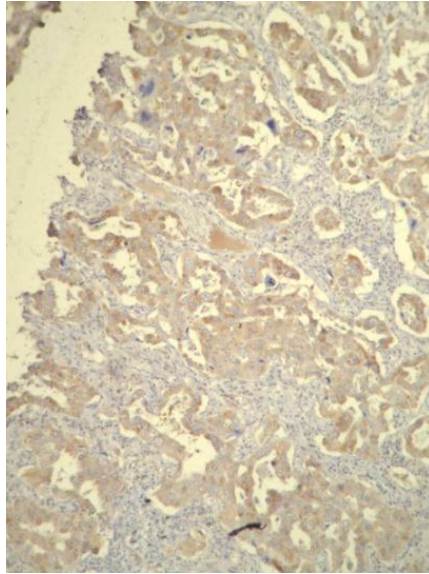

D

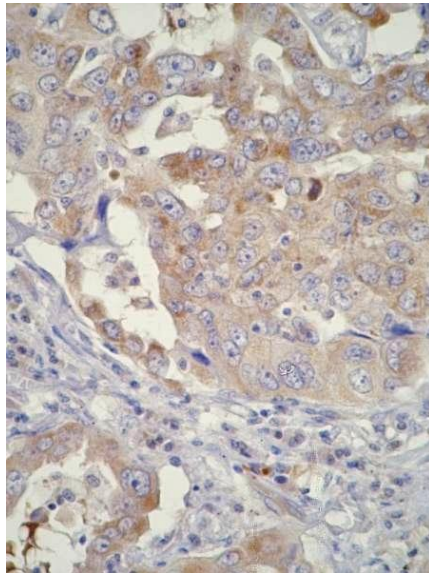

E

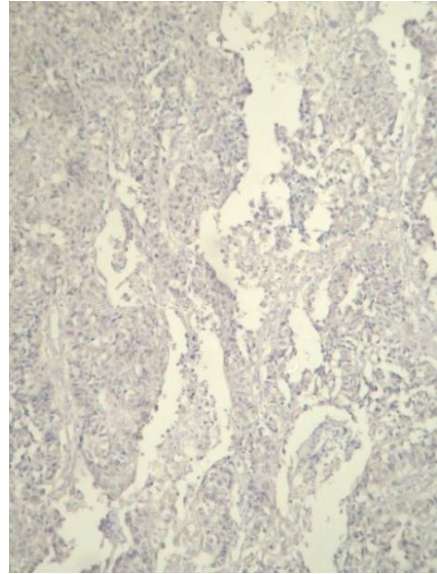

F

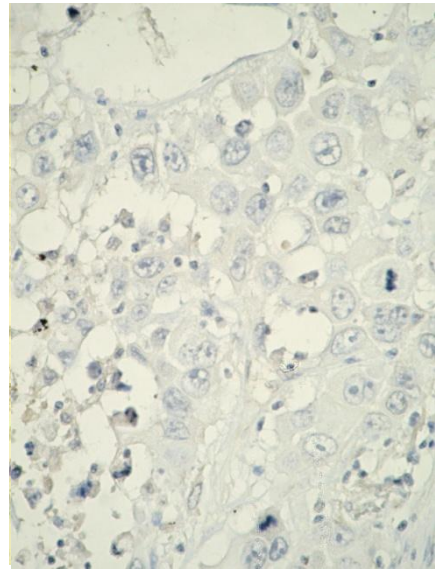

Bronchial epithelium

Adenocarcinoma

Squamous cell carcinoma

Supplement: MOESM5 [file 9461800]
